# Supplementary material for: Endogenous Polyamines and Ethylene Biosynthesis in Relation to Germination of Osmoprimed Brassica napus Seeds under Salt Stress
Source: MDPI journal article supplement (doi:10.3390/ijms23010349), 2021-12-29
Supplement: s1 [file s1]

# Endogenous Polyamines and Ethylene Biosynthesis in Relation to Germination of Osmoprimed *Brassica napus* Seeds under Salt Stress

Katarzyna Lechowska, Łukasz Wojtyła, Muriel Quinet, Szymon Kubala, Stanley Lutts and Małgorzata Garnczarska \*

**Table S1.** PAs concentrations (nmol/g DW) in the seeds of *Brassica napus* before the start of germination (dry unprimed seeds, UP<sub>d</sub> and primed dried seeds, P<sub>d</sub>) as well as during germination (primed seeds germinating 7 h in water, P<sub>7H<sub>2</sub>O</sub>; unprimed seeds germinating 11 h in water, UP<sub>11H<sub>2</sub>O</sub>; primed seeds germinating 7 h in NaCl, P<sub>7NaCl</sub>; unprimed seeds germinating 16 h in NaCl, UP<sub>16NaCl</sub>).

| PAs                   | UP <sub>d</sub>        | P <sub>d</sub>         | P <sub>7H<sub>2</sub>O</sub> | UP <sub>11H<sub>2</sub>O</sub> | P <sub>7NaCl</sub>     | UP <sub>16NaCl</sub>  |
|-----------------------|------------------------|------------------------|------------------------------|--------------------------------|------------------------|-----------------------|
| Free Put              | 45.73 ± 0.68           | 53.20 ± 4.77           | 61.23 ± 5.86                 | 43.10 ± 3.96                   | 60.80 ± 2.39           | 62.93 ± 2.46          |
| Conjugated Put        | 57.63 ± 5.17           | 68.90 ± 2.57           | 54.33 ± 5.06                 | 43.35 ± 1.44                   | 53.74 ± 1.36           | 85.16 ± 2.53          |
| Bound Put             | 36.06 ± 2.09           | 38.95 ± 0.90           | 38.60 ± 3.55                 | 38.77 ± 4.21                   | 26.33 ± 1.96           | 29.32 ± 1.36          |
| <b>Total Put</b>      | <b>139.42 ± 2.68</b>   | <b>161.05 ± 6.08</b>   | <b>154.16 ± 7.85</b>         | <b>125.22 ± 2.31</b>           | <b>140.87 ± 2.98</b>   | <b>177.41 ± 1.91</b>  |
| Free Spd              | 515.58 ± 4.90          | 396.00 ± 30.60         | 431.03 ± 40.01               | 425.79 ± 18.00                 | 430.64 ± 3.39          | 328.04 ± 1.80         |
| Conjugated Spd        | 519.15 ± 29.80         | 502.25 ± 41.13         | 350.15 ± 15.71               | 420.56 ± 13.88                 | 339.61 ± 25.50         | 471.85 ± 4.18         |
| Bound Spd             | 382.39 ± 23.24         | 315.93 ± 30.96         | 344.59 ± 26.58               | 370.81 ± 49.75                 | 259.08 ± 22.84         | 265.07 ± 9.67         |
| <b>Total Spd</b>      | <b>1417.12 ± 11.24</b> | <b>1214.18 ± 57.47</b> | <b>1125.77 ± 39.21</b>       | <b>1217.16 ± 66.25</b>         | <b>1029.33 ± 18.26</b> | <b>1064.96 ± 7.41</b> |
| Free Spm              | 141.38 ± 4.10          | 112.74 ± 9.75          | 122.72 ± 15.45               | 111.36 ± 4.99                  | 126.50 ± 6.21          | 82.48 ± 1.82          |
| Conjugated Spm        | 116.23 ± 17.98         | 127.22 ± 5.77          | 88.41 ± 6.11                 | 92.47 ± 5.32                   | 99.73 ± 10.36          | 109.33 ± 2.29         |
| Bound Spm             | 35.31 ± 3.21           | 29.81 ± 3.02           | 37.06 ± 2.09                 | 41.19 ± 3.15                   | 26.65 ± 3.01           | 23.77 ± 2.48          |
| <b>Total Spm</b>      | <b>292.92 ± 18.37</b>  | <b>269.77 ± 19.58</b>  | <b>248.19 ± 21.71</b>        | <b>245.02 ± 12.29</b>          | <b>252.88 ± 6.95</b>   | <b>215.58 ± 4.54</b>  |
| <b>Free PAs</b>       | <b>702.69 ± 7.41</b>   | <b>561.94 ± 34.94</b>  | <b>614.98 ± 41.27</b>        | <b>580.25 ± 36.62</b>          | <b>617.94 ± 10.13</b>  | <b>473.45 ± 2.10</b>  |
| <b>Conjugated PAs</b> | <b>693.01 ± 52.37</b>  | <b>698.37 ± 50.10</b>  | <b>492.90 ± 21.64</b>        | <b>556.38 ± 23.29</b>          | <b>493.08 ± 33.23</b>  | <b>666.34 ± 5.64</b>  |
| <b>Bound PAs</b>      | <b>453.76 ± 24.29</b>  | <b>384.69 ± 11.77</b>  | <b>420.25 ± 14.15</b>        | <b>450.77 ± 32.45</b>          | <b>312.06 ± 20.36</b>  | <b>318.16 ± 0.30</b>  |
| <b>Total PAs</b>      | <b>1849.46 ± 32.11</b> | <b>1645.00 ± 82.51</b> | <b>1528.12 ± 65.53</b>       | <b>1587.40 ± 80.63</b>         | <b>1423.08 ± 21.91</b> | <b>1457.95 ± 5.35</b> |
